# Supplementary material for: Hand2 inhibits kidney specification while promoting vein formation within the posterior mesoderm
Source: eLife. 2016 Nov 2;5:e19941. doi: 10.7554/eLife.19941 (PMC5132343; doi:10.7554/eLife.19941)
Supplement: Figure 1—source data 1. — Number of tubule cells observed in transverse sections from embryos at 24 hpf were quantified at three different anterior-posterior levels along the pronephron, with two sections analyzed per level in each embryo. Three animals for each genotype (wild-type and hans6) were examined. Average number of cells and standard deviation are represented in Figure 1S. DOI: http://dx.doi.org/10.7554/eLife.19941.004 [file elife-19941-fig1-data1.xlsx]

## Sheet: Sheet1
Pronephron Tubule Cells Per Cross Section
GENOTYPE	GE	EMBRYO	LEVEL	#CELLS
Wild-type	24hpf	1	1	6
Wild-type	24hpf	1	1	5
Wild-type	24hpf	1	2	4
Wild-type	24hpf	1	2	5
Wild-type	24hpf	1	3	5
Wild-type	24hpf	1	3	4
Wild-type	24hpf	2	1	5
Wild-type	24hpf	2	1	4
Wild-type	24hpf	2	2	5
Wild-type	24hpf	2	2	5
Wild-type	24hpf	2	3	4
Wild-type	24hpf	2	3	5
Wild-type	24hpf	3	1	5
Wild-type	24hpf	3	1	4
Wild-type	24hpf	3	2	5
Wild-type	24hpf	3	2	5
Wild-type	24hpf	3	3	4
Wild-type	24hpf	3	3	4
han	24hpf	1	1	7
han	24hpf	1	1	7
han	24hpf	1	2	7
han	24hpf	1	2	7
han	24hpf	1	3	6
han	24hpf	1	3	7
han	24hpf	2	1	6
han	24hpf	2	1	7
han	24hpf	2	2	8
han	24hpf	2	2	4
han	24hpf	2	3	7
han	24hpf	2	3	6
han	24hpf	3	1	6
han	24hpf	3	1	6
han	24hpf	3	2	9
han	24hpf	3	2	7
han	24hpf	3	3	10
han	24hpf	3	3	7
