# Supplementary material for: Hand2 inhibits kidney specification while promoting vein formation within the posterior mesoderm
Source: eLife. 2016 Nov 2;5:e19941. doi: 10.7554/eLife.19941 (PMC5132343; doi:10.7554/eLife.19941)
Supplement: Figure 1—source data 2. — Pronephron tubules in transverse sections from embryos at 24 hpf were measured at three different anterior-posterior levels along the pronephron, with two sections analyzed per level in each embryo. Three animals for each genotype (wild-type and hans6) were examined. Average tubule area and standard deviation are represented in Figure 1T. DOI: http://dx.doi.org/10.7554/eLife.19941.005 [file elife-19941-fig1-data2.xlsx]

## Sheet: Sheet1
Pronephron Tubule Area in Cross-section
GENOTYPE	GE	EMBRYO	LEVEL	AREA (µm²)
Wild-type	24hpf	1	1	284.639
Wild-type	24hpf	1	1	417.734
Wild-type	24hpf	1	2	348.392
Wild-type	24hpf	1	2	298.728
Wild-type	24hpf	1	3	418.603
Wild-type	24hpf	1	3	248.75
Wild-type	24hpf	2	1	302.762
Wild-type	24hpf	2	1	323.642
Wild-type	24hpf	2	2	469.444
Wild-type	24hpf	2	2	334.938
Wild-type	24hpf	2	3	300.104
Wild-type	24hpf	2	3	248.278
Wild-type	24hpf	3	1	485.13
Wild-type	24hpf	3	1	521.008
Wild-type	24hpf	3	2	510.143
Wild-type	24hpf	3	2	468.675
Wild-type	24hpf	3	3	403.879
Wild-type	24hpf	3	3	396.097
han	24hpf	1	1	750.388
han	24hpf	1	1	782.593
han	24hpf	1	2	518.064
han	24hpf	1	2	733.017
han	24hpf	1	3	502.151
han	24hpf	1	3	551.063
han	24hpf	2	1	584.883
han	24hpf	2	1	587.926
han	24hpf	2	2	562.937
han	24hpf	2	2	392.716
han	24hpf	2	3	630.979
han	24hpf	2	3	466.6
han	24hpf	3	1	485.008
han	24hpf	3	1	538.828
han	24hpf	3	2	460.689
han	24hpf	3	2	461.522
han	24hpf	3	3	556.612
han	24hpf	3	3	462.607
